# Supplementary material for: Overexpression of SlUPA-like induces cell enlargement, aberrant development and low stress tolerance through phytohormonal pathway in tomato
Source: PubMed Central journal article supplement (PMC4812305; doi:10.1038/srep23818), 2016-03-30

**Title:**

Overexpression of *SIUPA-like* induces cell enlargement, aberrant development and low stress tolerance through phytohormonal pathway in tomato

**Authors:**

Baolu Cui, Zongli Hu, Jingtao Hu, Yanjie Zhang, Wencheng Yin, Zhiguo Zhu, Ye Feng, and  
Guoping Chen \*

Key Laboratory of Biorheological Science and Technology (Chongqing University), Ministry of Education, Bioengineering College, Chongqing University, Chongqing 400044, People's Republic of China

## Supplementary Information

**Table S1.** Statistical analysis of putative binding sites for bHLH transcription factor in the promoters of related genes

| Genes           | the number of<br>CANNTG motifs | the number of<br>CACGTG motifs | Chromosomes |
|-----------------|--------------------------------|--------------------------------|-------------|
| <i>SIGID1-A</i> | 3                              | 1                              | 9           |
| <i>SIGID1-B</i> | 2                              | 0                              | 6           |
| <i>SIGID1-C</i> | 2                              | 2                              | 1           |
| <i>SIGAST1</i>  | 6                              | 0                              | 2           |
| <i>SIPRE1</i>   | 8                              | 1                              | 2           |
| <i>SIPRE2</i>   | 3                              | 0                              | 2           |
| <i>SIPRE3</i>   | 8                              | 0                              | 6           |
| <i>SIPRE4</i>   | 6                              | 0                              | 5           |
| <i>SIPRE5</i>   | 9                              | 0                              | 4           |
| <i>SIJAZ2</i>   | 2                              | 0                              | 12          |
| <i>SIJAZ9</i>   | 3                              | 1                              | 8           |
| <i>SIJAZ10</i>  | 8                              | 1                              | 8           |
| <i>SIJAZ11</i>  | 6                              | 1                              | 8           |

**Table S2.** PCR primers used in this study

| Primer names                       | Sequences (5' → 3')                                       |
|------------------------------------|-----------------------------------------------------------|
| <i>qSICAC-F</i>                    | CCTCCGTTGTGATGTAAGTGG                                     |
| <i>qSICAC-R</i>                    | ATTGGTGGAAAGTAACATCATCG                                   |
| oligo(dT)                          | GCTGTCAACGATACGCTACGT AACGGCATGACAGTGTTTTTTTTTTTTTTTTTTTT |
| <i>qNPTII-F</i>                    | GACAATCGGCTGCTCTGA                                        |
| <i>qNPTII-R</i>                    | AACTCCAGCATGAGATCC                                        |
| <i>SIUPA-like-F</i>                | CGCGGATCCATGGCTGCTTTTTCATCACACC                           |
| <i>SIUPA-like-R</i>                | CCGGAATTCTTAATGGAAAGAACAAAAGTTGTTGC                       |
| <i>dT-R</i>                        | GCTGTCAACGATACGCTACGT AACG                                |
| <i>qSIUPA-like-F</i>               | GGGTCTTCTTCTATGACTTCTGCT                                  |
| <i>qSIUPA-like-R</i>               | TTTCATCTTTGGCTACTAACTTGC                                  |
| <i>qSIEF1<math>\alpha</math>-F</i> | TACTGGTGGTTTTGAAGCTG                                      |
| <i>qSIEF1<math>\alpha</math>-R</i> | AACTTCCTTCACGATTTTCATCATA                                 |
| <i>qGA20ox1-F</i>                  | TTCTCAAATTGGCTTCATGATCAA                                  |
| <i>qGA20ox1-R</i>                  | TTCCCCCTAATTCCCATAACAT                                    |
| <i>qGA20ox2-F</i>                  | TAAGAAGGAT AAGGTGGTGAGGC                                  |
| <i>qGA20ox2-R</i>                  | CCGTAGTTTTCTGTTGAAGCCA                                    |
| <i>qGA3ox1-F</i>                   | ATAGGCACCCACCCTTGTATA                                     |
| <i>qGA3ox1-R</i>                   | GGATGAAAGTGCCTTGTCAAAT                                    |
| <i>qGA3ox2-F</i>                   | GTAGACCAAAGGAACCCTCAAAT                                   |
| <i>qGA3ox2-R</i>                   | GCCGAACAGATGAAAGTGCT                                      |
| <i>qGA2ox1-F</i>                   | ATTAAGATCCAATAACACTTCG                                    |
| <i>qGA2ox1-R</i>                   | TCTTGATTTACACTATTTGC                                      |
| <i>qGAST1-F</i>                    | CAACAACAGAGAAATAACCAAC                                    |
| <i>qGAST1-R</i>                    | TTATACGATGTCTTTGAACACC                                    |
| <i>qSIPRE1-F</i>                   | CGAAAGAACGAAAAGAGAGACATT                                  |
| <i>qSIPRE1-R</i>                   | GCTAGAGCGACGATTGCGAA                                      |
| <i>qSIPRE2-F</i>                   | TATGTCTGGGAGAAGGTCAAGGA                                   |
| <i>qSIPRE2-R</i>                   | CGACGATTACGAATTTAGGAAG                                    |
| <i>qSIPRE3-F</i>                   | TTCACACTCTCCATAGCAACACAT                                  |
| <i>qSIPRE3-R</i>                   | TCCCTACTTATCCTTGATCCTCC                                   |
| <i>qSIPRE4-F</i>                   | ATCAAATCGCTGATCTTGTTC                                     |
| <i>qSIPRE4-R</i>                   | CACTTAATCCATCCACTTCTCTGTGTA                               |
| <i>qSIPRE5-F</i>                   | CCTTCTCTCTTTGTCCATAACTTGTC                                |
| <i>qSIPRE5-R</i>                   | CCTGATGATTGTCTCGAACCG                                     |
| <i>qSIExPA8-F</i>                  | CTGATTTGTTAAATGTTTCGGTGA                                  |
| <i>qSIExPA8-R</i>                  | AAGAATGATTCTTTTTTTGGGGA                                   |
| <i>qKRP1-F</i>                     | GCGGTGATGGTGGGTTCGTAT                                     |
| <i>qKRP1-R</i>                     | CGTCCTTAACACCCTTTCCCTC                                    |
| <i>qKRP2-F</i>                     | TTCACAAACCACCCACCCC                                       |
| <i>qKRP2-R</i>                     | TGACCATTTTCGTCCACCTCC                                     |
| <i>qKRP3-F</i>                     | GGCTGGAGAAACCCTTGG                                        |
| <i>qKRP3-R</i>                     | CCCTCAAACCTCCGATTCTGTC                                    |

|                     |                            |
|---------------------|----------------------------|
| <i>qKRP4-F</i>      | CACAAGGAAGAGGAAGAAGCG      |
| <i>qKRP4-R</i>      | CCAAAACCAGATGCTGAAACG      |
| <i>CycA3;1-F</i>    | CTAAGAAAAGAGCAGCAGAAGCA    |
| <i>CycA3;1-R</i>    | GATTCCTTATCTTTTTTCAGCAACAG |
| <i>CycB1;1-F</i>    | GTATCTCGCCCCGTAACAAG       |
| <i>CycB1;1-R</i>    | TCTCCTCAGGTTTTGGCTTT       |
| <i>CycD2;1-F</i>    | CTGCCAAAGCCTCAAGCG         |
| <i>CycD2;1-R</i>    | CAGTGGAGCTAGTGTCATTTCGC    |
| <i>qSlJAZ2-F</i>    | TAGCCAACAAACAGAACCCCA      |
| <i>qSlJAZ2-R</i>    | AAGTGAATTCCGTCTCGCGAT      |
| <i>qSlJAZ10-F</i>   | GGAACACTCTTTCTCCTAGCAAC    |
| <i>qSlJAZ10-R</i>   | TGGTGATGAAGGCTCAGACAGCTT   |
| <i>qSlJAZ11-F</i>   | GGAGTTTAGGCTTATGCCACCTTC   |
| <i>qSlJAZ11-R</i>   | GGCTCAGATATTGGTGACAGACTC   |
| <i>qSlGID1-A-F</i>  | GCGGTGTTGTTGAATGAGAATC     |
| <i>qSlGID1-A-R</i>  | GTCTTGTGCAGATCAGCTCCC      |
| <i>qSlGID1-B-F</i>  | GGTGTTTATTCATTTGATGTTGTTG  |
| <i>qSlGID1-B-R</i>  | AGAATGTGTTCGTAAATAGCACTGTT |
| <i>qSlGID1-C-F</i>  | GCCTACTTAGCCGTGTCTATCG     |
| <i>qSlGID1-C-R</i>  | AGTGTGCAAACTTCCACCATG      |
| <i>SlUPA-like-F</i> | GGGTCTTCTTCTATGACTTCTGCT   |
| <i>SlUPA-like-R</i> | TTTCATCTTTGGCTACTAACTTGC   |
| <i>qSlPI-I-F</i>    | CTTCTTGCAACTTCCTTTG        |
| <i>qSlPI-I-R</i>    | TGTTTTTCCTTCGCACATC        |
| <i>qSlPI-II-F</i>   | ATGCTTGCACCTTTAATTGTGATC   |
| <i>qSlPI-II-R</i>   | TAATAGCAACCCTTGTACCCTGTG   |
| <i>qSlNCED1-F</i>   | CCCGATTTGGTATTCTGGATAAGTA  |
| <i>qSlNCED1-R</i>   | GAGACGGATTTCGGATAAAACACT   |
| <i>qSnRK2.3-F</i>   | ATCATTACCTCACTGGAAGCTTGGAC |
| <i>qSnRK2.3-R</i>   | AAACAGTGGATACCAAAAGATCGCC  |
| <i>CAT1-F</i>       | AAATGGGTTGAGTCTTTATCCGA    |
| <i>CAT1-R</i>       | TCATTGATTTTTTACATTGTAGGCT  |
| <i>GME2-F</i>       | CCATCACATTCCAGGACCAGA      |
| <i>GME2-R</i>       | CGTAATCCTCAACCCATCCTTC     |
| <i>LEA-F</i>        | TATTGGTAAAGATTGGGACATTGA   |
| <i>LEA-R</i>        | TGTCTTCTTGTTTGTACCCGTTTC   |
| <i>Xcc-F</i>        | TGCCTACCGAGAAATCCC         |

---

**Figure S1 | Adaxial and abaxial pavement cell of leaves were detected by hand-sliced method and magnification was 40×** The adaxial epidermal cell of AC<sup>++</sup> (A) and *SIUPA-L-OE* lines (B). The abaxial epidermal cell of AC<sup>++</sup> (C) and *SIUPA-L-OE* lines (D).

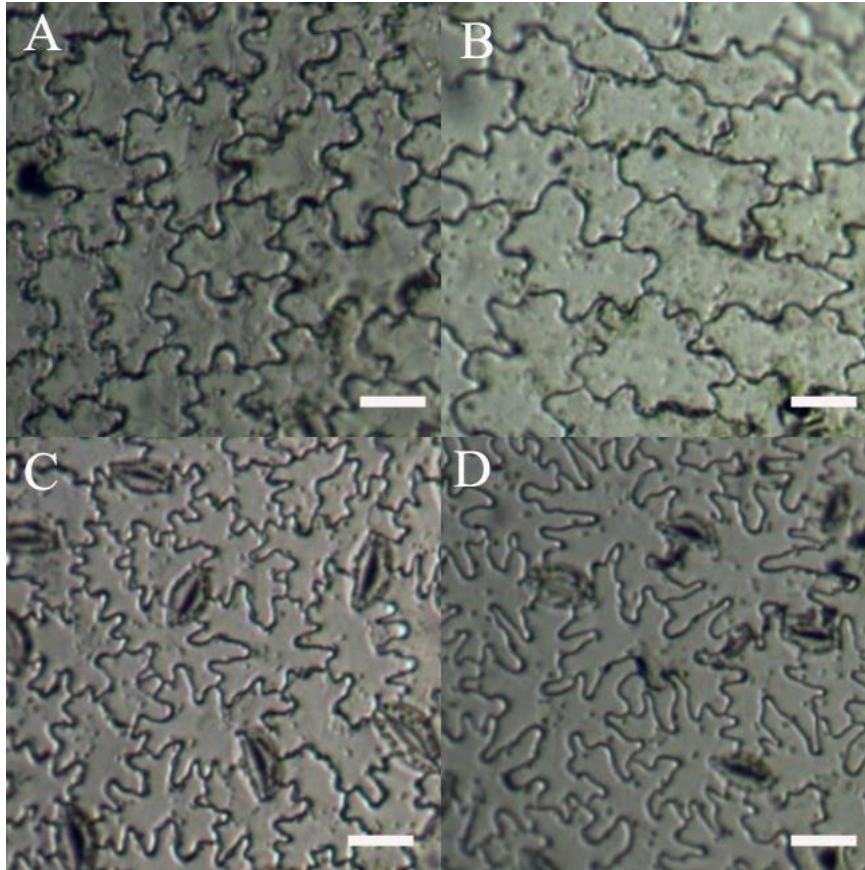

**Figure S2 | Phylogenetic analysis of *KRPs* in tomato and Arabidopsis.**

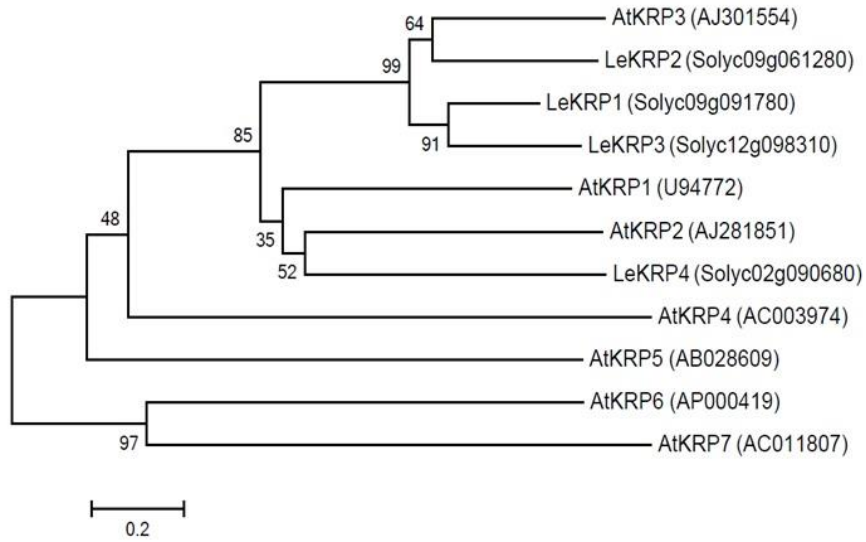

**Figure S3 | The leaf veins displayed different phenotypes in control and *SIUPA-L*-OE lines.**

The phenotypes of leaf vein from  $AC^{++}$  (A) and of transgenic lines (B). Their magnification was  $40\times$ . (C). The phenotypes of leaf vein of  $AC^{++}$  and the magnification was  $80\times$ . PM, Phloem; XM, Xylem; PT, Palisade Tissues; ST, Spongy Tissues; PC, Parenchyma Cells.

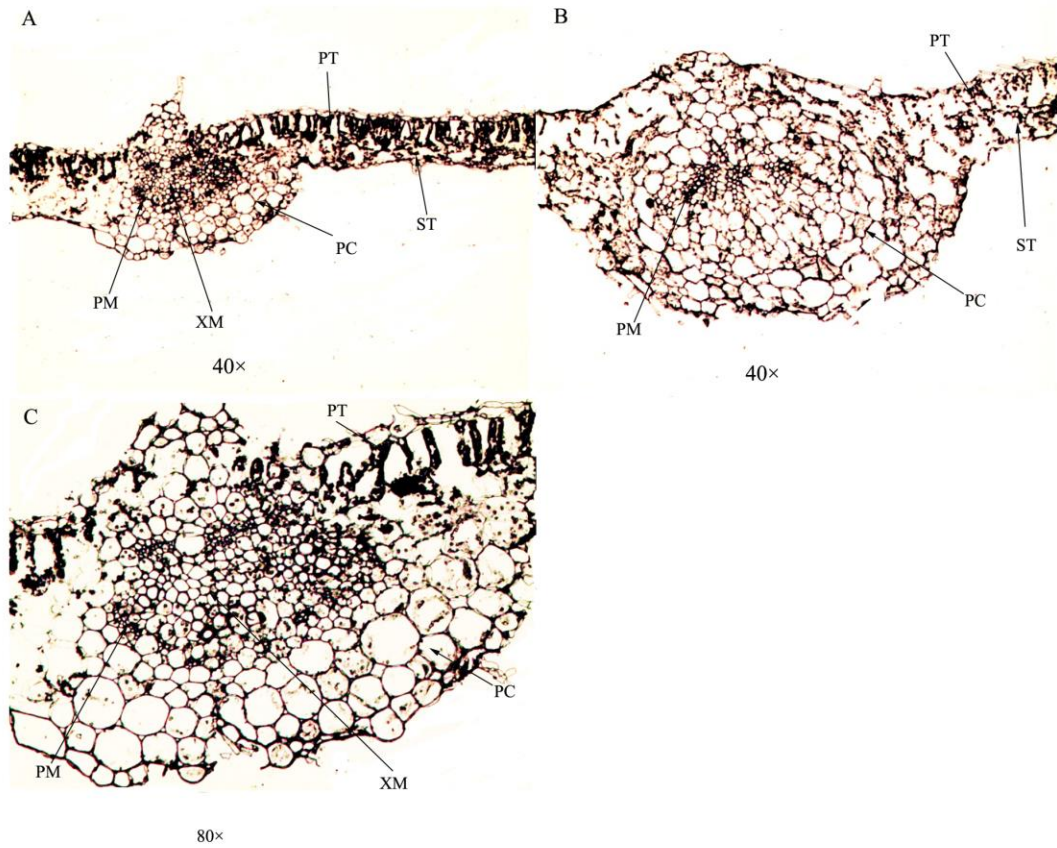

Figure S4 | The auxiliary buds further from apex of plants was repressed in *SIUPA-L-OE* lines.

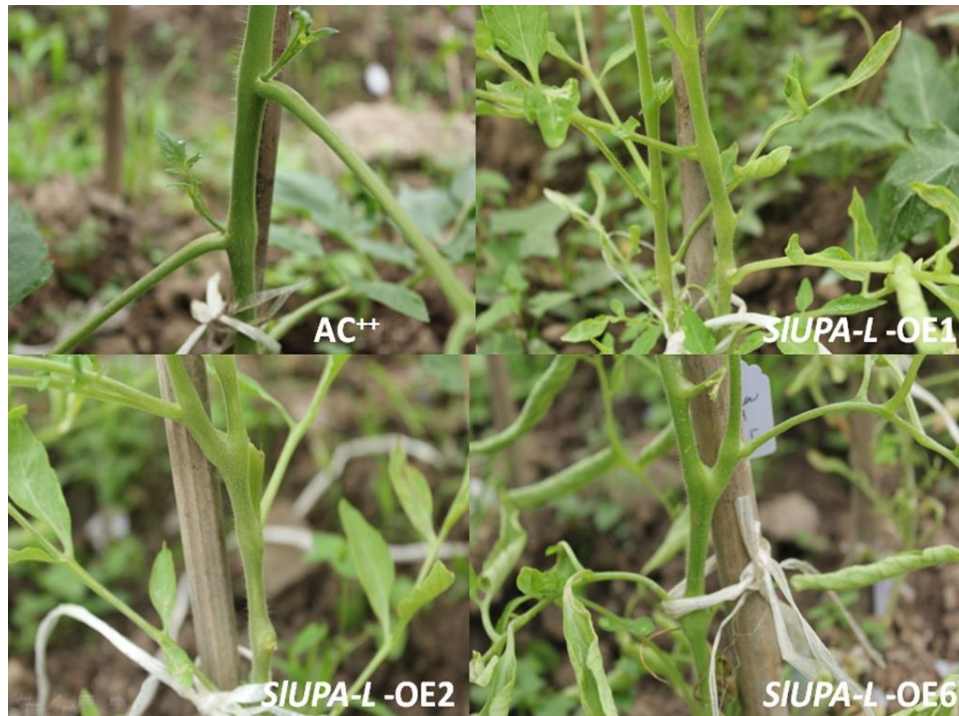



**Figure S5 | Phylogenetic analysis of *GID1s* genes in Arabidopsis and tomato.**

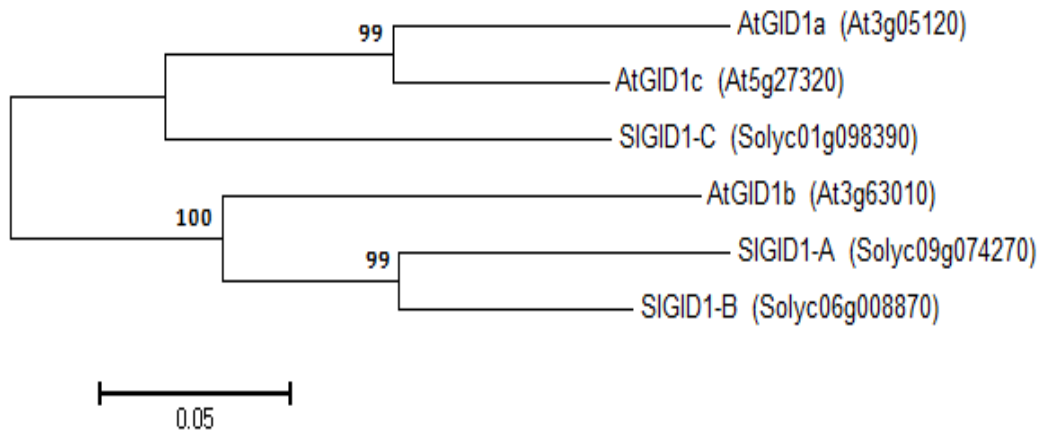

**Figure S6 | Phylogenetic analysis of *PREs* genes in Arabidopsis and tomato.**

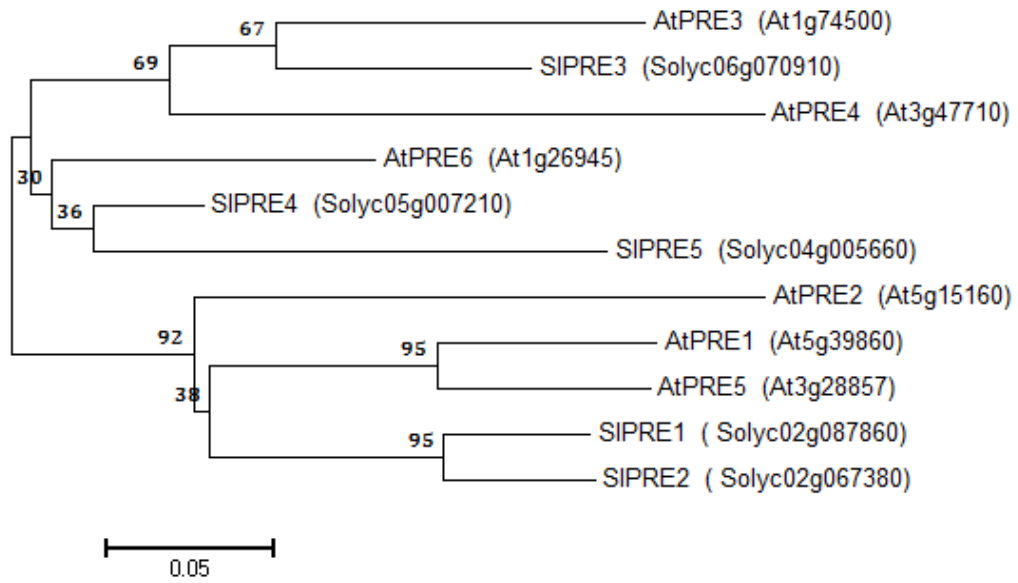

**Figure S7 | Detection of PCR products of *Xcc* genomes after 8 days post-inoculation by agarose gel electrophoresis.**

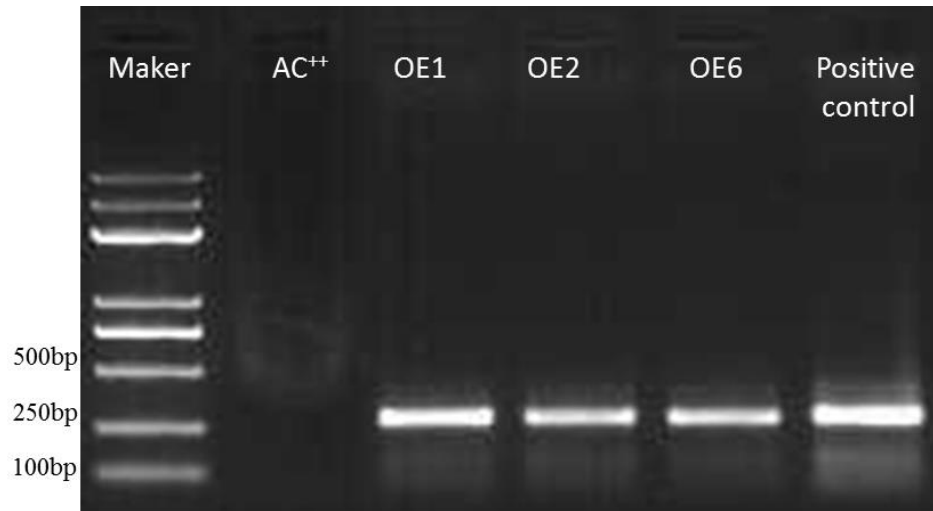

**Figure S8 |  $AC^{++}$  and *SIUPA-L-OE1* showed sick phenotypes when exposed to disease plants after 10 days.** The phenotypes of  $AC^{++}$  not exposed to disease plants (A) and exposed to disease plants (B) for 10 days. The phenotypes of *SIUPA-L-OE1* not exposed to disease plants (C) and exposed to disease plants (D) for 10 days.

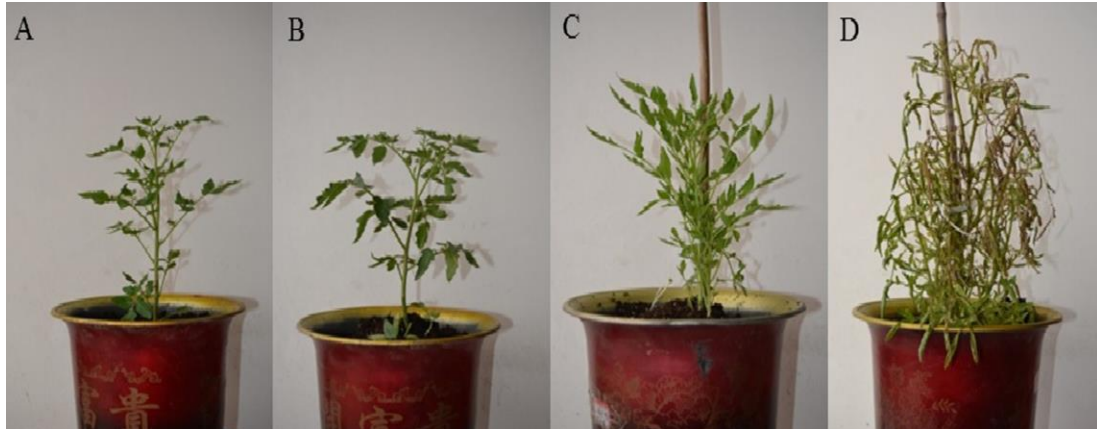

Supplement: srep23818-s1.pdf [file srep23818-s1.pdf]
